# Supplementary material for: Incorporation of Immune Checkpoint Blockade into Chimeric Antigen Receptor T Cells (CAR-Ts): Combination or Built-In CAR-T
Source: Int J Mol Sci. 2018 Jan 24;19(2):340. doi: 10.3390/ijms19020340 (PMC5855562; doi:10.3390/ijms19020340)
Supplement: Supplementary file 1 [file ijms-19-00340-s001.pdf]

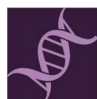

Supplementary table 1. Summary of preclinical studies on the combination of immune checkpoint blockade and CAR-T cells

| Ref                  | Mode of checkpoint blockade                                                                                                           | CAR structure<br>(target-costimulatory<br>domain) | Experimental model                                                                                                     | Key findings                                                                                                                                                                                                                                                                                                                           |
|----------------------|---------------------------------------------------------------------------------------------------------------------------------------|---------------------------------------------------|------------------------------------------------------------------------------------------------------------------------|----------------------------------------------------------------------------------------------------------------------------------------------------------------------------------------------------------------------------------------------------------------------------------------------------------------------------------------|
| John 2013 [42]       | Anti-PD-1 Ab<br>250 µg on D0, 3, and 7                                                                                                | HER2-CD28 CAR                                     | Mouse sarcoma cells, 24JK-Her2<br>Mouse breast carcinoma cells,<br>e0771-Her2                                          | Increased PD-1 expression on CAR-T following antigen stimulation<br>A significant improvement in tumor growth inhibition by the combo of CAR-T and anti-PD-1 antibody with increased CAR-T function                                                                                                                                    |
| Cherkassky 2016 [38] | Anti-PD-1 Ab, 10 mg/kg, ip 3 times or continuously every 5 days from D0 to D85,<br>PD-1 DNR coexpression or<br>PD-1 shRNA blockade    | Mesothelin-CD28 CAR<br>Mesothelin-41BB CAR        | Human pleural mesothelioma cells, MSTO-211H (orthotopic pleural mesothelioma model)<br>Intrapleural CAR-T injection    | Immune exhaustion of CAR-T following in vivo antigen exposure<br>Delayed exhaustion of 41BB CAR-T cells than CD28 CAR-T cells<br>Inhibition of CAR-T cell effector functions by tumor-cell PD-L1<br>Rescue of CD28 CAR-T cell function in vivo by PD-1 antibody or PD-1 DNR expression and in vitro by PD-1 targeting shRNA expression |
| Moon 2014 [39]       | Ex-vivo blockade of PD-1 with 10 µg/mL anti-PDL1 Ab or<br>SSB, 25 µg/mL for SHP-1 inhibition                                          | Mesothelin-41BB CAR                               | Human mesothelioma cell line, EMMESO                                                                                   | Hypofunction of CAR TILs with upregulation of SHP-1, PD-1, LAG-3, TIM-3 and 2B4, which was reversible.<br>Enhanced CAR-T cells ex vivo killing function by blockade of PD-1 or SHP-1                                                                                                                                                   |
| Moon 2016 [43]       | Anti-PD-1 Ab, 10 mg/kg every 5 days<br>ip                                                                                             | NY-ESO1-reactive<br>Ly95 TCR T-cells              | Human lung cancer cell line, A549-A2-ESO                                                                               | Reversible hypofunction of Ly95 TILs with high expression of PD-1, LAG-3 and TIM-3. Augmentation of Ly95 T cells' efficacy in vivo by anti-PD-1 antibody                                                                                                                                                                               |
| Burga 2015 [44]      | Anti-PD-L1 Ab, 10 µg ip on D2, 4, 6, 8, 10, 12, 14, and 16 post-tumor injection                                                       | CEA-CD28 CAR                                      | Murine colon adenocarcinoma cell line, MC38-CEA                                                                        | Suppression of CAR-T through STAT3-dependent PD-L1 expression by MDSC<br>Rescue of CAR-T efficacy by MDSC depletion, GM-CSF neutralization or PD-L1 blockade                                                                                                                                                                           |
| Suarez 2016 [49]     | Bicistronic CAR secreting human anti-PD-L1 Ab                                                                                         | CAIX-CD28 CAR                                     | Orthotopic model of human ccRCC cell lines, skrc52 and skrc59                                                          | Reversal of CAR-T exhaustion in anti-PD-L1 Ab secreting CAR-T with decreased expression of PD-1, TIM-3 and LAG-3 and better tumor control                                                                                                                                                                                              |
| Li 2017 [50]         | Bicistronic CAR secreting human anti-PD-1 Ab vs. systemic anti-PD-1 Ab, 125 µg per mouse on days 1, 5, 9 and 12 after T cell transfer | CD19-CD28 CAR                                     | Human lung cancer cell, NCI H292-CD19<br>Human ovarian cancer cell, SKOV3-CD19                                         | Enhanced antitumor activity of anti-PD-1 secreting CAR-T cells with lower expression of PD-1 and LAG-3                                                                                                                                                                                                                                 |
| Tanoue [51]          | Helper-dependent adenovirus (HDAd) that express a PD-L1 blocking mini-antibody or anti-PD-L1 IgG (100 µg ip at day 0, 3, and 6)       | HER2-CD28-CAR                                     | Human prostate cancer cell line PC-3, human NSLC cell line A549,<br>human HCC cell line HepG2,<br>human SqCC line SiHa | Superiority of local production of PD-L1 mini-body by CAAd-VECPDL1 combined with administration of CAR-T cells                                                                                                                                                                                                                         |

|                 |                                                                                                                     |                                                              |                                                                                                                                       |                                                                                                                                                                                                                                                                           |
|-----------------|---------------------------------------------------------------------------------------------------------------------|--------------------------------------------------------------|---------------------------------------------------------------------------------------------------------------------------------------|---------------------------------------------------------------------------------------------------------------------------------------------------------------------------------------------------------------------------------------------------------------------------|
| Liu [53]        | CSR of PD-1 and CD28<br>Anti-PD-1 Ab (pembrolizumab ip, 10 mg/kg every 5 days)<br>PD-1 DNR                          | CD19-41BB-CAR<br>Mesothelin-41BB-CAR<br>PSCA-41BB-CAR        | EMMESO; Human leukemic cells, PD-L1+ Nalm6; Human CML cell line, CD19+ PD-L1+ K562; Human prostate cancer cell line, PSCA+ PD-L1+ PC3 | CAR T cells with CSR of PD1:CD28 enhanced CAR infiltration to tumor, decreased susceptibility to tumor-induced hypofunction, and attenuation of inhibitory receptor expression compared with treatments with CAR T cells alone or PD-1 antibodies.                        |
| Rupp [54]       | CRISPR/Cas9 mediated disruption of PD-1                                                                             | CD19-41BB-CAR                                                | CD19+ PD-L1+ K562                                                                                                                     | Cas9RNP-mediated PD-1 disruption augmented CAR-T cell mediated killing of tumor cells in vitro and enhanced clearance of PDL1+ tumor xenografts in vivo.                                                                                                                  |
| Ren [55]        | CRISPR/Cas9 mediated disruption of TRAC/TRBC/B2M/PD-1                                                               | CD19-41BB-CAR<br>PSCA-41BB-CAR                               | PDL1+ Nalm6<br>PSCA+ PD-L1+ PC3                                                                                                       | Multiple deliveries of gRNAs disrupt genes in human primary T cells with high efficiency without impairing effector function.<br>Reduced alloreactivity of TCR and B2M double-disrupted T cells<br>Disruption of PD-1 in CAR T cells leads to enhanced antitumor efficacy |
| Ren [60]        | CRISPR/Cas9 mediated disruption of TRAC/TRBC/B2M/Fas/PD-1/CTLA-4                                                    | CD19-41BB-CAR<br>PSCA-41BB-CAR                               | CD19+ K562<br>Nalm6                                                                                                                   | Efficient multiplex genome editing by a one-shot CRISPR protocol by incorporating multiple gRNAs in a CAR lentiviral vector                                                                                                                                               |
| Eyquem [36]     | Knock-in CD19 CAR-T to TRAC locus by CRISPR/Cas9                                                                    | CD19-CD28-CAR                                                | Nalm6                                                                                                                                 | Knock-in of CAR-T to TRAC locus results in uniform CAR-T expression enhances CAR-T potency by preventing exhaustion.                                                                                                                                                      |
| Liu [65]        | CRISPR/Cas9 mediated disruption of LAG-3                                                                            | CD19-NA-CAR                                                  | CD19+ K562<br>Raji                                                                                                                    | Ca9RNP-mediated LAG-3 disruption did not increase activity of CAR-T compared with stand alone CAR-T                                                                                                                                                                       |
| Kenderian [71]  | Anti-PD-1 Ab on D3, 6, 9, 12 (10 mg/kg/dose)<br>Anti-TIM-3 Ab on D3, 6, 9, 12 (10 mg/kg/dose)                       | CD123-41BB-CAR                                               | AML cell line, MOLM                                                                                                                   | PD-1 and TIM-3 pathways are involved in CAR-T exhaustion and dysfunction in AML model.                                                                                                                                                                                    |
| Condomines [74] | CTLA-4 shRNA                                                                                                        | CD19-CD28-CAR                                                | NALM6                                                                                                                                 | CTLA-4 down-regulation increases efficiency of CD19 CAR-T-cell expressing CD80 but not that of CD19-CD28 CAR-T cells                                                                                                                                                      |
| Moon [78]       | Bicistronic CAR expressing dnSHP-1 SSB, 20 mg/kg i.m every 2 days                                                   | Mesothelin-41BB CAR                                          | EMMESO<br>PDL1+ EMMESO                                                                                                                | Higher infiltration into tumor and better control of tumor by CAR-T/dnSHP-1                                                                                                                                                                                               |
| Beavis [81]     | A2AR knock-down by shRNA<br>Anti-PD-1 Ab (200 µg, D0 and 4, 8)<br>SCH58261 1 mg/kg, daily<br>ZM241385 1 mg/kg daily | Murine anti-human<br>HER2-CD28 CAR<br>Human HER2-CD28<br>CAR | Mouse sarcoma cells, 24JK-Her2<br>Mouse breast carcinoma cells, e0771-Her2<br>Primary melanoma cell line                              | Increased A2AR expression and suppression of CAR-T cells after CAR activation, which was reversible upon pharmacological or genetic targeting of A2AR<br>Increased CAR-T activity upon dual blockade of anti-PD-1 and A2AR                                                |

Abbreviations: A2AR, adenosine 2A receptor; AML, acute myeloid leukemia; ccRCC, clear cell renal cell carcinoma; B2M, beta-2-microglobulin; CSR, chimeric switch receptor; DNR, dominant negative receptor; GM-CSF, granulocyte-macrophage colony-stimulating factor; MDSC, myeloid-derived suppressor cells; NA, not available; RNP, ribonucleoprotein; SSB, Sodium stibogluconate; TIL, tumor-infiltrating lymphocyte; TRAC, TCR  $\alpha$  chain constant region; TRBC, TCR  $\beta$  chain constant region; \* SCH58261 and ZM241385 are A2AR antagonists.
